# Supplementary material for: Cruciform DPVBi: synthesis, morphology, optical and electroluminescent properties
Source: Royal Society of Chemistry journal article supplement (doi:10.1039/b807266c), 2008-01-01
Supplement: b807266c.pdf [file b807266c.pdf]

## Supplementary Information for *J. Mater. Chem.*

### **Cruciform DPVBi: Synthesis, Morphology, Optical and Electroluminescent Properties**

**Suijun Liu, Feng He, Huan Wang, Hai Xu, Chunyu Wang, Feng Li\* and**

**Yuguang Ma\***

*State Key Lab of Supramolecular Structure and Materials, Jilin University, 2699*

*Qianjin Avenue, Changchun 130012 P. R. China.*

**The structure characterization of octaethyl biphenyl-2,2',5,5'-tetrayltetrakis(met-hylene)tetraphosphonate (tetra(phosphonate)) and 2,5,2',5'-tetrakis(2,2-diphenylvinyl)biphenyl (TDPVBi)**

**1.  $^1\text{H-NMR}$  spectrum of tetra(phosphonate):**

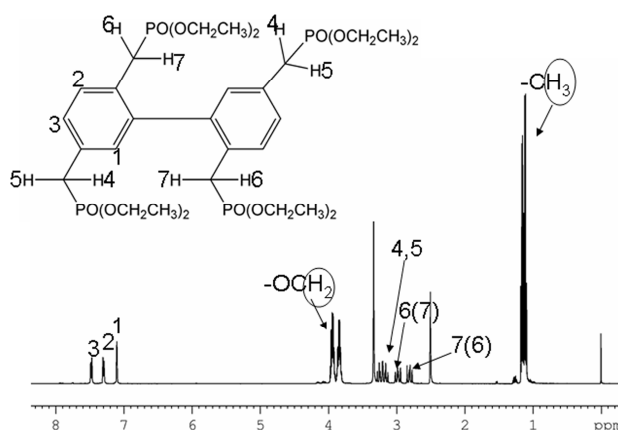

**Fig. S1** The  $^1\text{H-NMR}$  (500 MHz, 25 °C,  $\text{DMSO-}d_6$ , TMS, ppm) spectrum of tetra(phosphonate).

**2.  $^{13}\text{C-NMR}$  spectrum of tetra(phosphonate):**

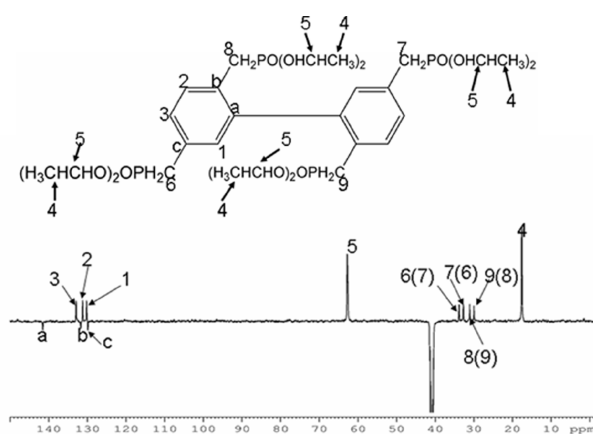

**Fig. S2** The  $^{13}\text{C}$ -NMR (125 MHz, 25 °C,  $\text{DMSO-}d_6$ ) spectrum of tetra(phosphonate).

### 3. Two-dimensional COSY spectrum of TDPVBi:

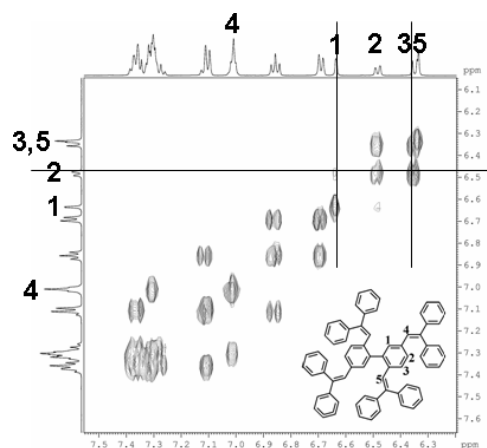

**Fig. S3** The two-dimensional COSY spectrum of **TDPVBi**.

As shown in **Fig. S3**, the neighbor protons  $\text{H}_3$ ,  $\text{H}_2$  with a strong H-H correlation and  $\text{H}_1$ ,  $\text{H}_2$  with a weak H-H correlation can be seen from two-dimensional COSY spectrum. These protons in central phenyl can be made sure by two-dimensional COSY spectrum, which is corresponding with  $^1\text{H}$  NMR. Some of the protons of around phenyls exhibit so complex H-H correlation, which can not be made sure by two-dimensional COSY spectrum.

#### 4. $^{13}\text{C}$ -NMR spectrum of TDPVBi:

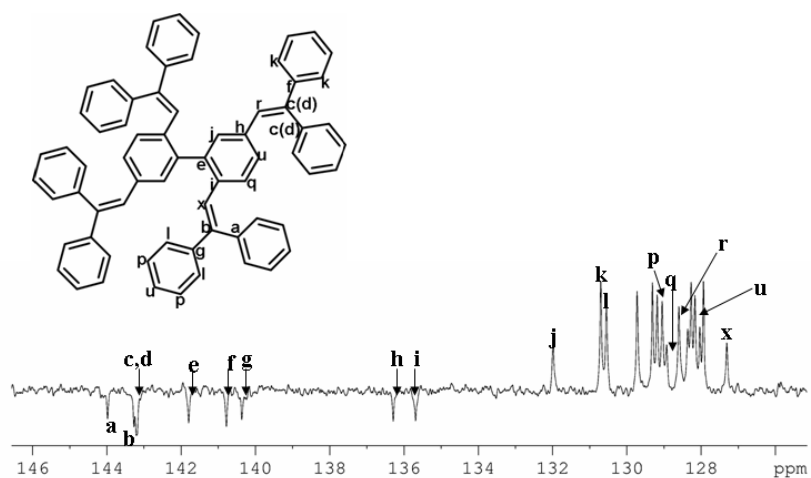

**Fig. S4** The  $^{13}\text{C}$ -NMR spectrum of TDPVBi.

Combined analysis of  $^1\text{H}$  NMR spectrum, two-dimensional COSY spectrum and HMBC spectrum, the  $^{13}\text{C}$ -NMR spectrum can be signed except some of the phenyls around. It is noted that C-a ( $\delta$  143.98) and C-g ( $\delta$  140.37), C-x ( $\delta$  127.31) and C-r ( $\delta$  128.59), C-f ( $\delta$  140.78) and C-c (d) ( $\delta$  143.20) are different, which reflect the twist structure of the molecule.

#### 5. MALDI-TOF mass spectrum of TDPVBi:

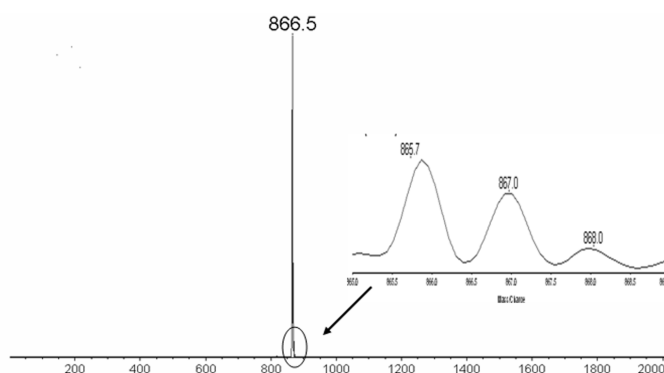

**Fig. S5** The matrix assisted MALDI-TOF mass spectrum of TDPVBi.  $[\text{M} + \text{H}]^+$  peak of TDPVBi at 866.50, which is in good agreement with the calculated value of 866.39 based on the  $\text{C}_{68}\text{H}_{50}$  molecular formula of TDPVBi.
